# Supplementary material
Source: PubMed Central journal article supplement (PMC4272450)

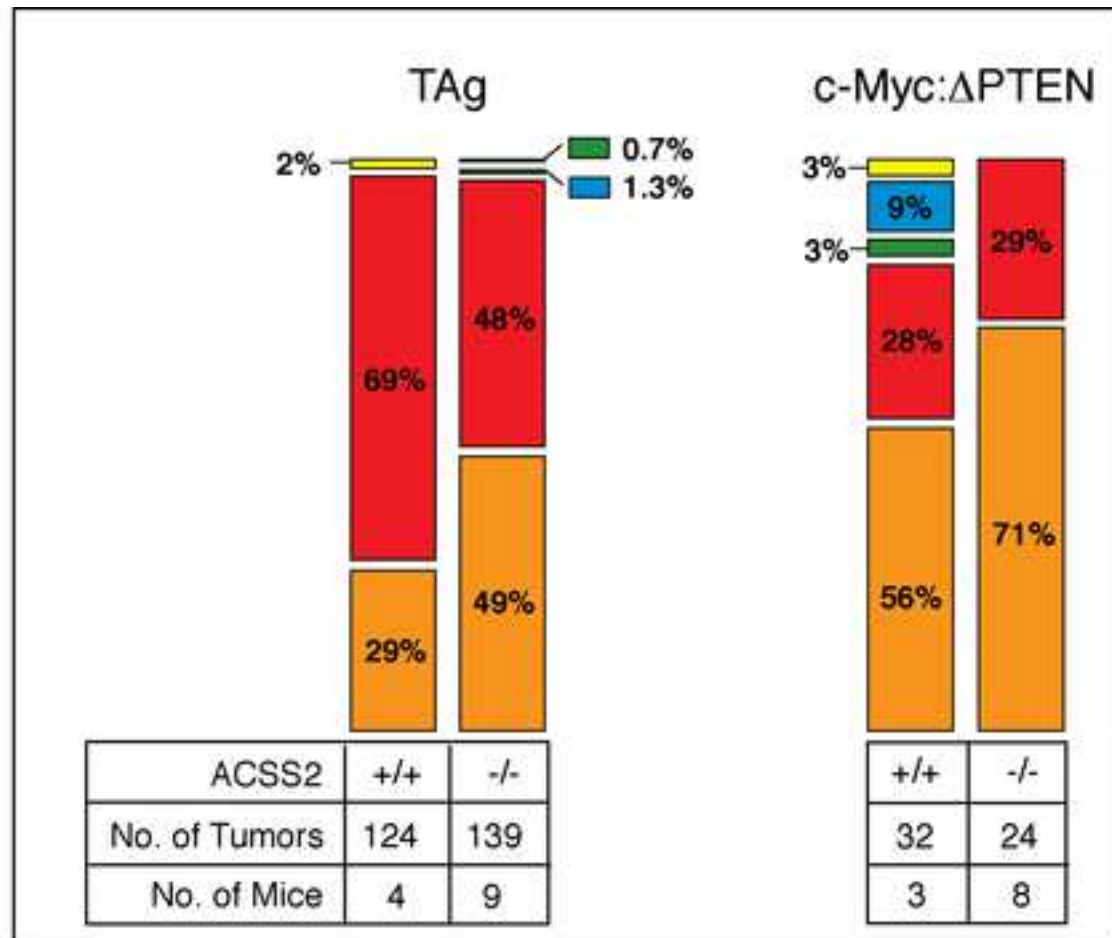

**Liver Tumor Variant:**

- Hepatocellular Carcinoma (HCC) (Well-differentiated)
- Hepatocellular Carcinoma (HCC) (Moderately-Poorly differentiated)
- Intra-hepatic Cholangiocarcinoma (CC)
- Mixed HCC/CC
- Hepatoblastoma

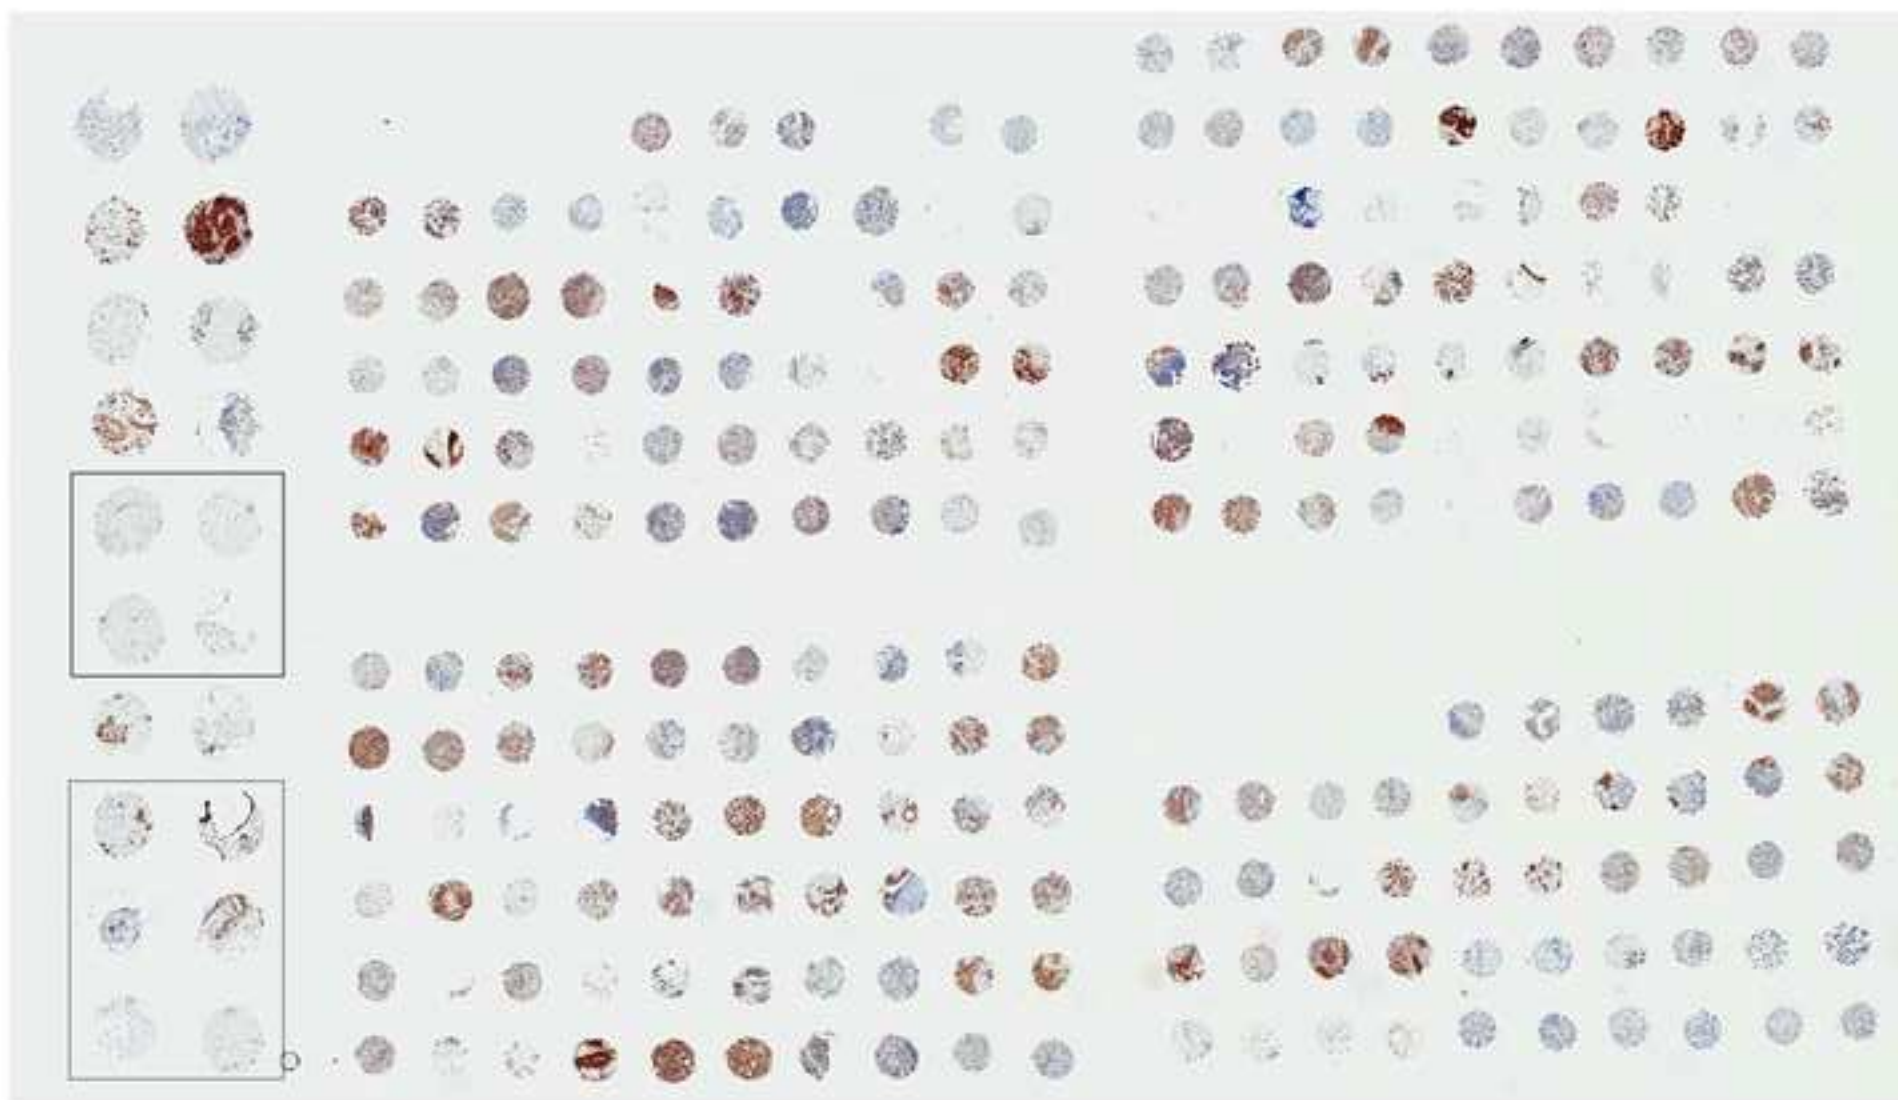

6mm

ACSS2  $+/+$  :TAg

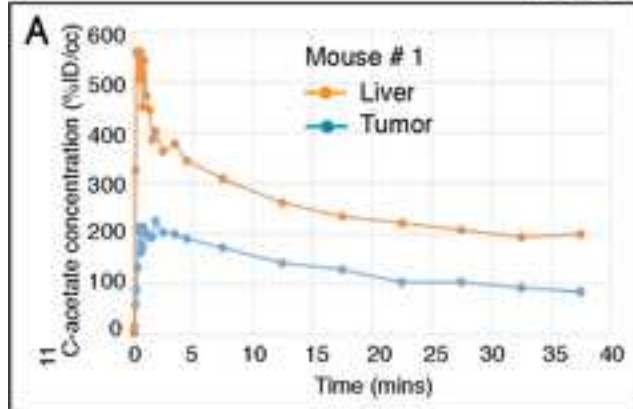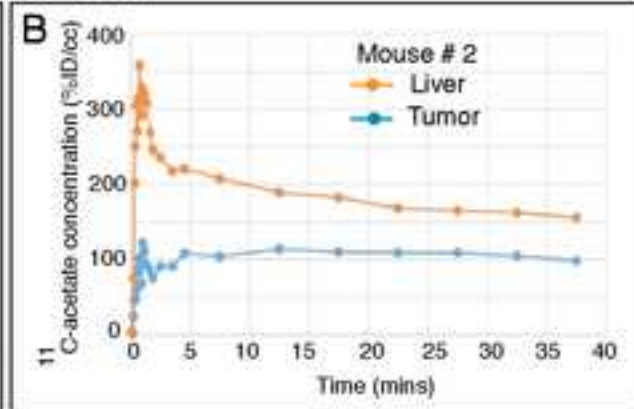

ACSS2  $-/-$  :TAg

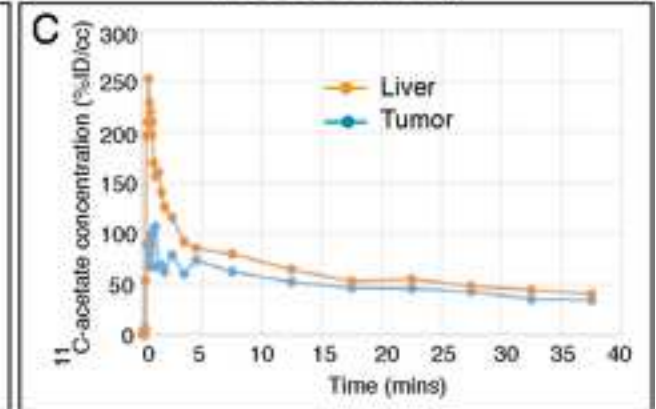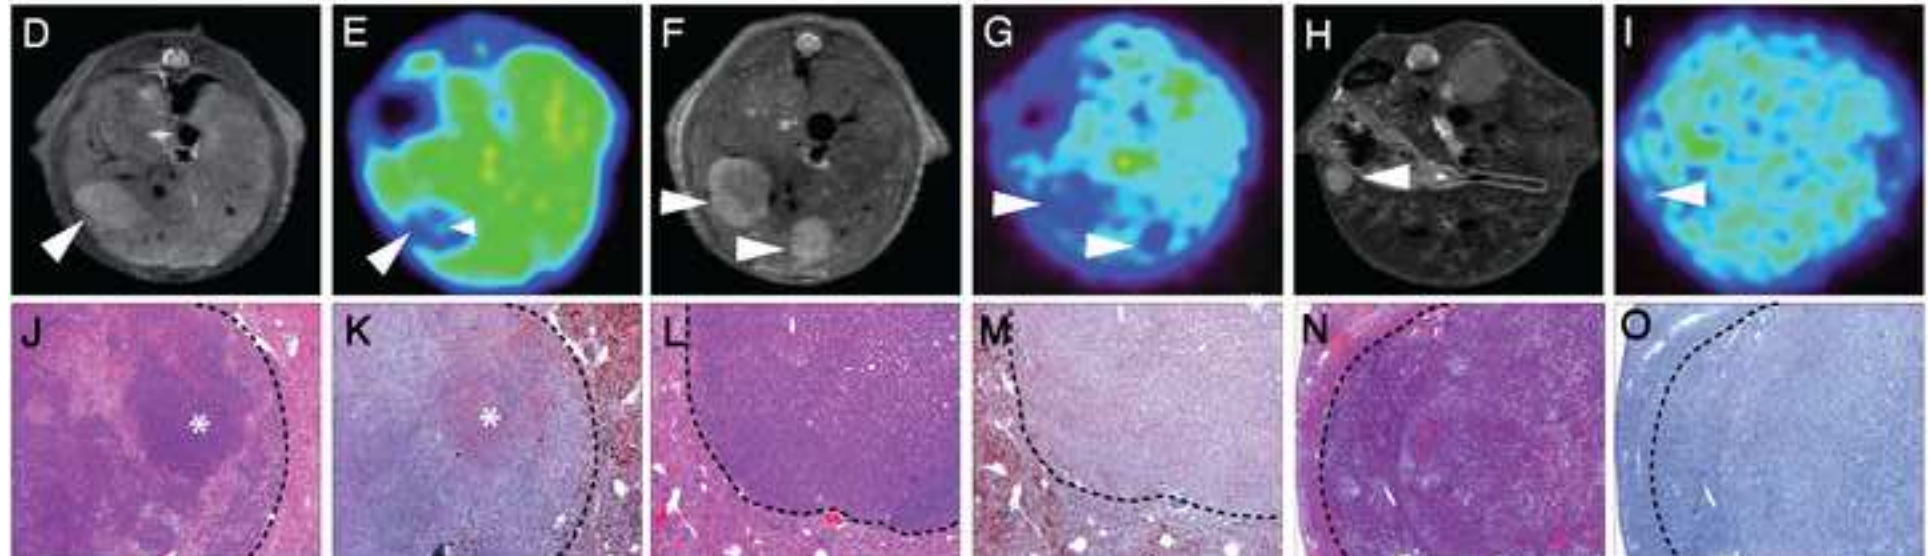

Supplement: NIHMS642906-supplement-01.pdf [file NIHMS642906-supplement-01.pdf]
